# Supplementary material for: Phylogenomic Relationships and Evolution of Polyploid Salix Species Revealed by RAD Sequencing Data
Source: PubMed Central journal article supplement (PMC7379873; doi:10.3389/fpls.2020.01077), 2020-07-17
Supplement: Image_1.pdf [file Image_1.pdf]

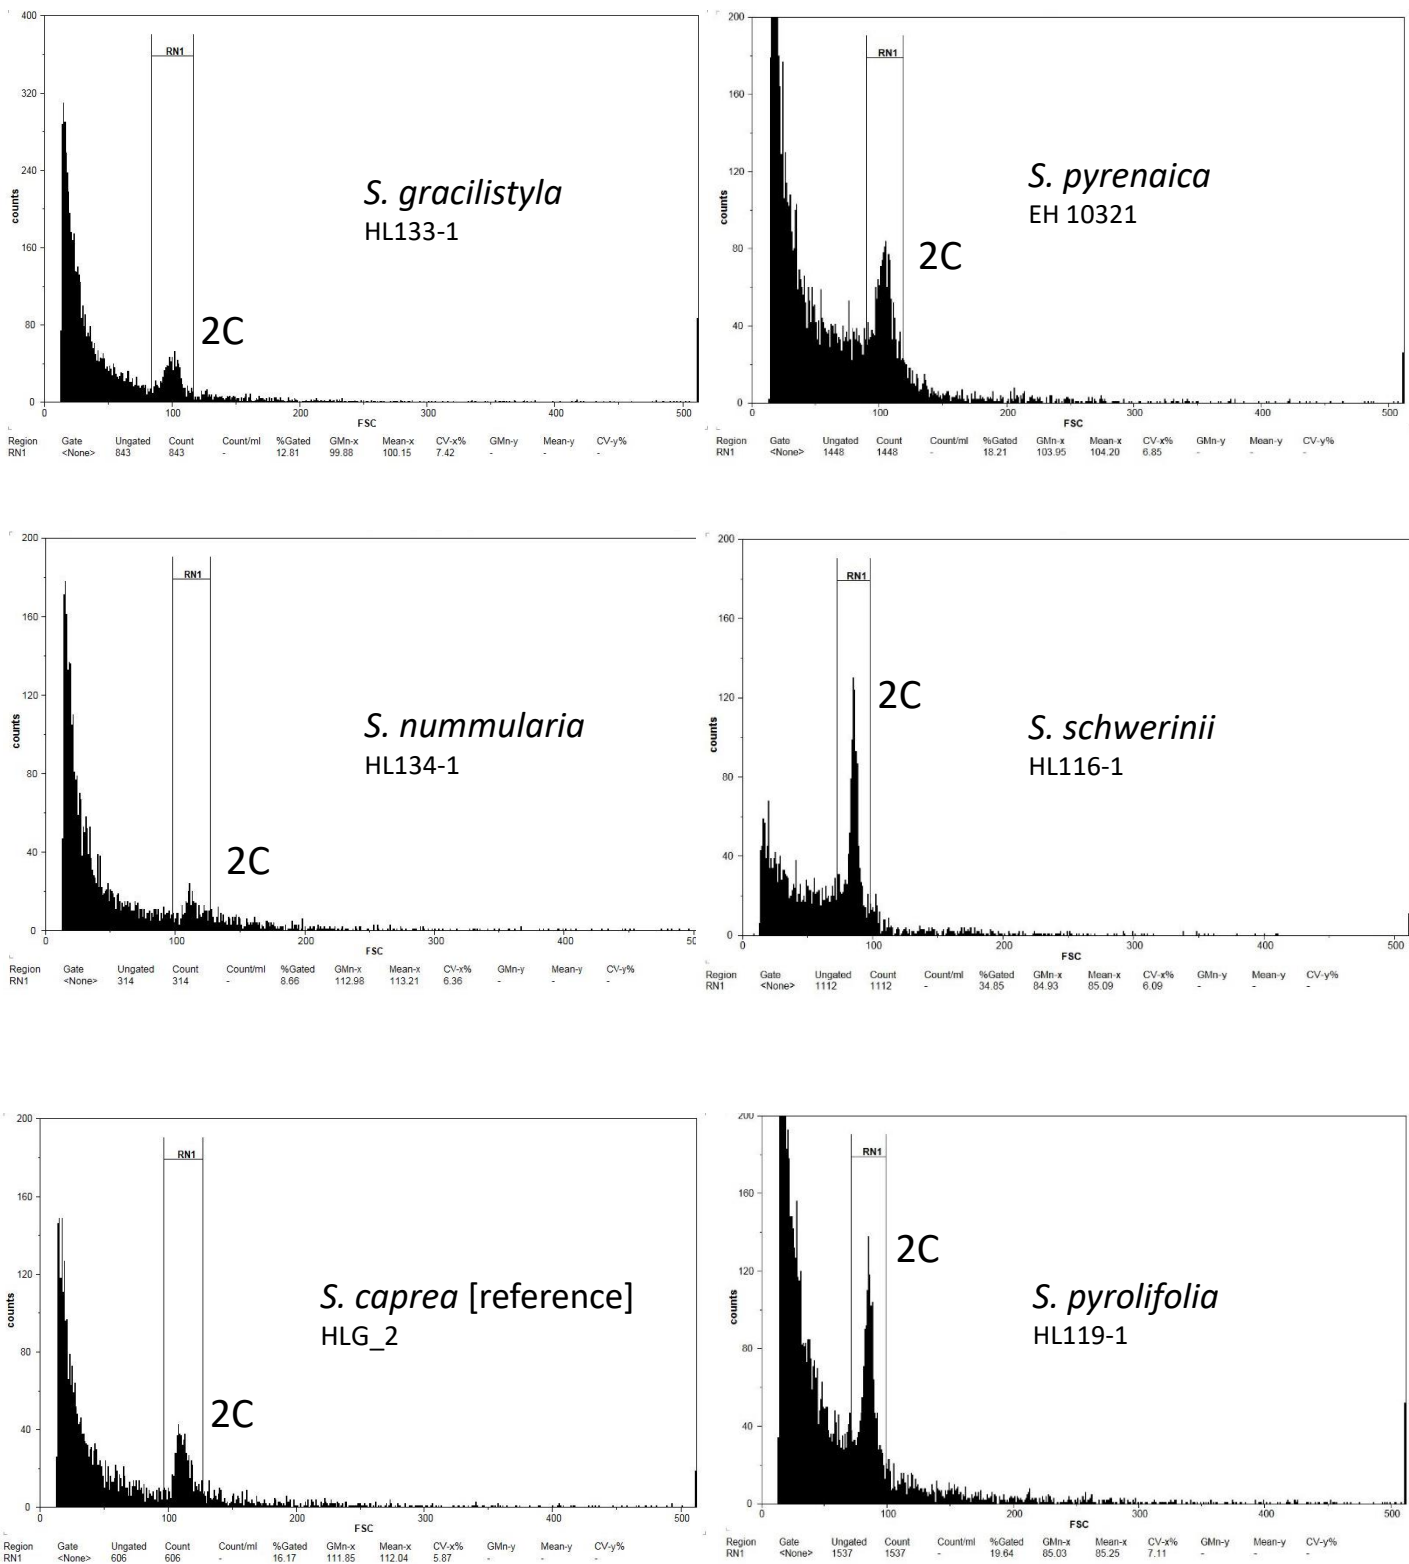

**Supplement Fig. S1:** selected flow cytometry histograms for measurements of included *Salix* species. Diploid *Salix caprea* was used as an external reference.
