# Supplementary material for: Phylogenomic Relationships and Evolution of Polyploid Salix Species Revealed by RAD Sequencing Data
Source: PubMed Central journal article supplement (PMC7379873; doi:10.3389/fpls.2020.01077), 2020-07-17
Supplement: Image_2.pdf [file Image_2.pdf]

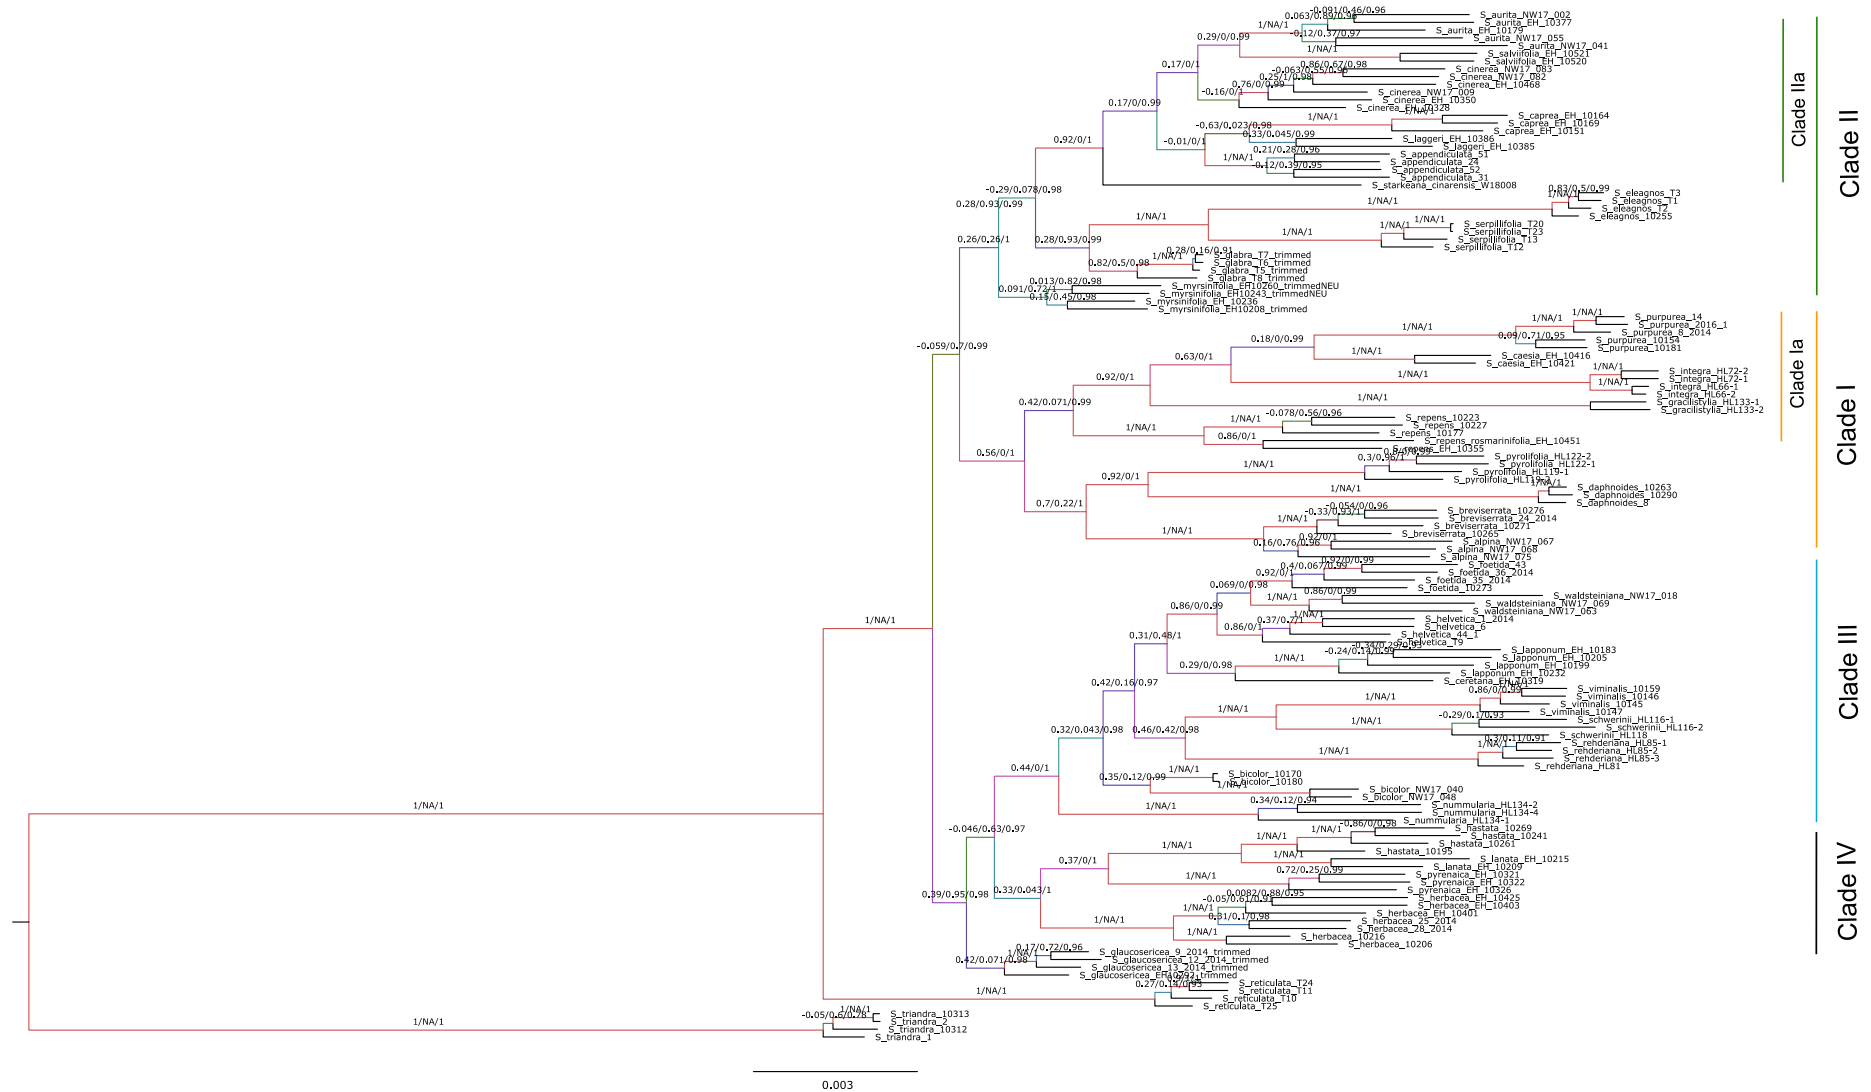

**Fig. S2:** Detailed RAxML phylogeny of 133 accessions representing 35 species of *Salix* subg. *Chamaetia/Vetrix* and *S. triandra* as outgroup based on 23,393 RAD loci. QS scores above branches. The four main clades are highlighted. For details see manuscript and Fig. 2.
