# Supplementary material for: Phylogenomic Relationships and Evolution of Polyploid Salix Species Revealed by RAD Sequencing Data
Source: PubMed Central journal article supplement (PMC7379873; doi:10.3389/fpls.2020.01077), 2020-07-17
Supplement: Image_4.pdf [file Image_4.pdf]

Wagner et al. - Supplement Fig. S4

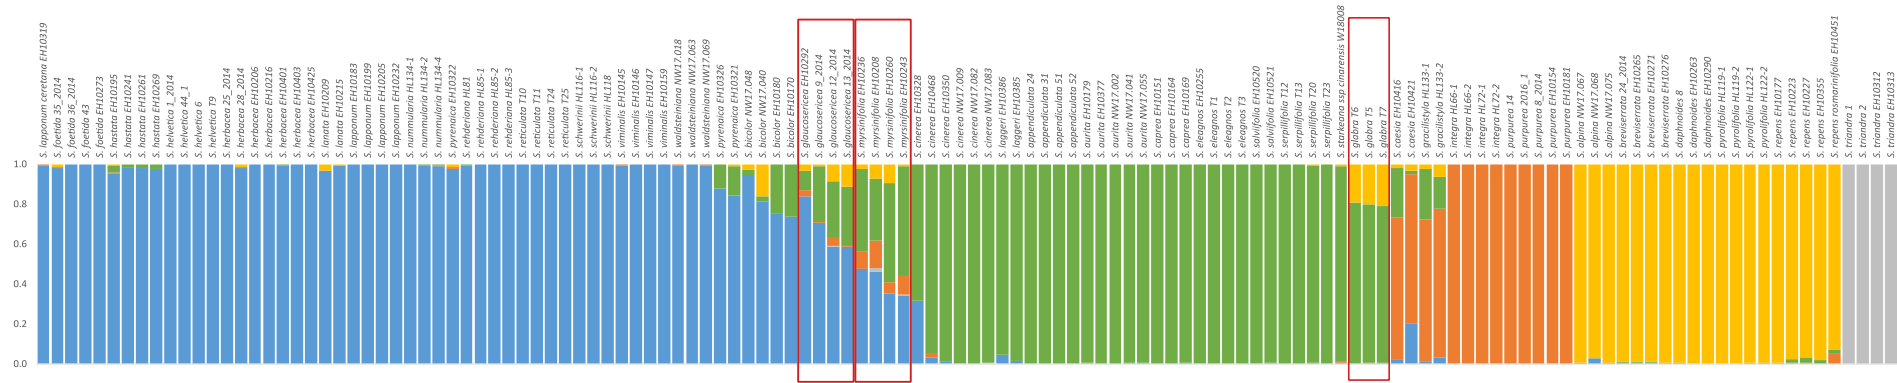

**Supplement Fig. S4.** Genetic structure analysis of the complete data set including 133 taxa samples based on 1,655 unlinked SNPs for most likely K=5. Higher polyploids *S. glaucosericea* (8x), *S. myrsinifolia* (6x) and *S. glabra* (6x) are indicated by red boxes.
