# Supplementary material for: Phylogenomic Relationships and Evolution of Polyploid Salix Species Revealed by RAD Sequencing Data
Source: PubMed Central journal article supplement (PMC7379873; doi:10.3389/fpls.2020.01077), 2020-07-17
Supplement: Table_2.pdf [file Table_2.pdf]

**Table S2. Statistics for tested ipyrad parameter sets for parameter optimization for 133 taxa.**

Main settings: Within and among sample clustering threshold of 85% similarity, min. read length 35bp, min depth for SNP base calling: six, maximum of two alleles per locus, max. 20 SNPs per locus, max. 8 indels per locus.

| minimum number of taxa per locus | number of loci | number of SNPs | number of PIS |
|----------------------------------|----------------|----------------|---------------|
| 4                                | 125,338        | 579,784        | 264,298       |
| 20                               | 14,580         | 125,029        | 71,213        |
| 40                               | 4,547          | 46,042         | 25,745        |
| 80                               | 1,948          | 19,747         | 10,501        |
| 100                              | 1,660          | 16,761         | 8,921         |
| 120                              | 1,259          | 12,554         | 6,666         |

Main settings: Within and among sample clustering threshold of 85% similarity, min. read length 35bp, min depth for SNP base calling: six, maximum of four alleles per locus, max. 20 SNPs per locus, max. 8 indels per locus.

| minimum number of taxa per locus | number of loci | number of SNPs | number of PIS |
|----------------------------------|----------------|----------------|---------------|
| 20                               | 14,580         | 461,863        | 273,811       |
| 40                               | 23,393         | 320,010        | 191,615       |

**Average statistics for final m40 dataset, average numbers and standard derivation.**

|         | # raw reads per sample in million | # filtered reads per sample in million | # clusters per sample | read depth per cluster | # loci per sample in assembly |
|---------|-----------------------------------|----------------------------------------|-----------------------|------------------------|-------------------------------|
| average | 8.08                              | 8.02                                   | 161,233               | 51.94                  | 16,938                        |
| (+/-)   | +/- 5.81                          | +/-5.66                                | +/-88,738             | +/- 28.75              | +/- 2,312                     |
